# Supplementary material
Source: MDPI journal article supplement (https://www.mdpi.com/1999-4907/15/5/867)
Supplement: s1 [file s1]

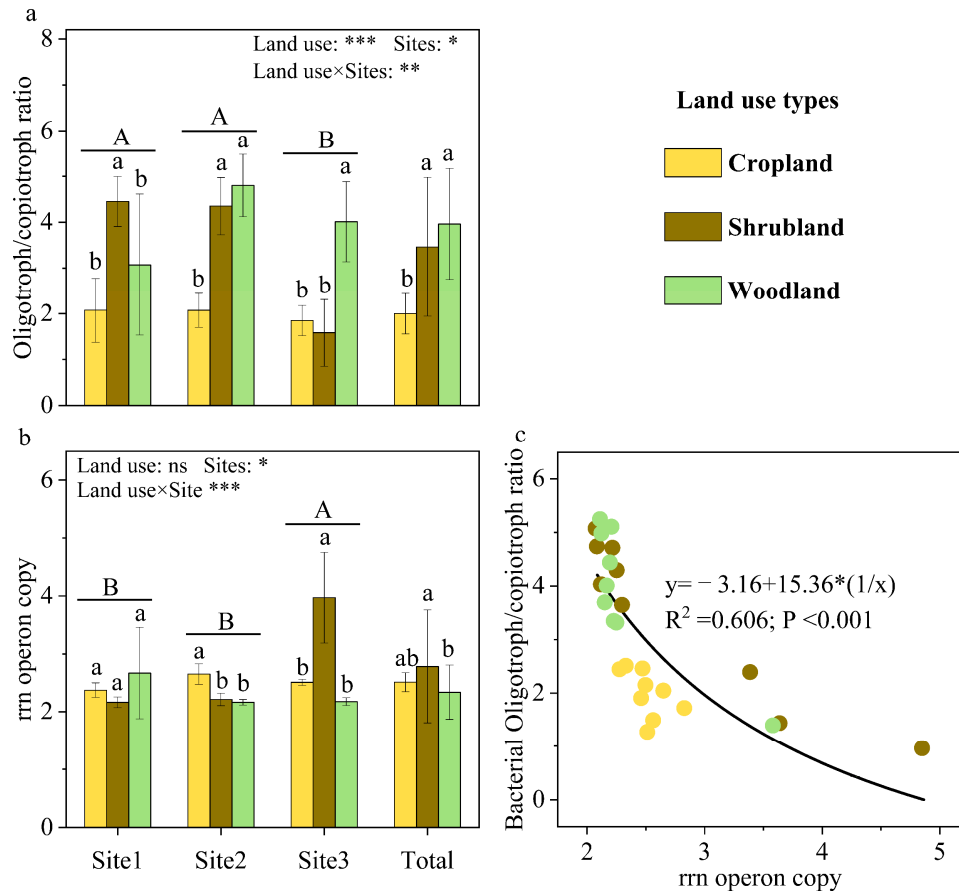

**Figure S1.** The (a) oligotrophs/copiotrophs ratio and (b) rrn operon copy number in different land use types, and (c) the relationship between bacterial rrn operon copy number and oligotrophs/copiotrophs ratio ( $n = 9$ ). "ns", "\*", "\*\*", and "\*\*\*\*" represent  $p > 0.05$ ,  $p < 0.05$ ,  $p < 0.01$ , and  $p < 0.001$ , respectively. Different letters indicated significant difference between different land use types ( $p < 0.05$ ).

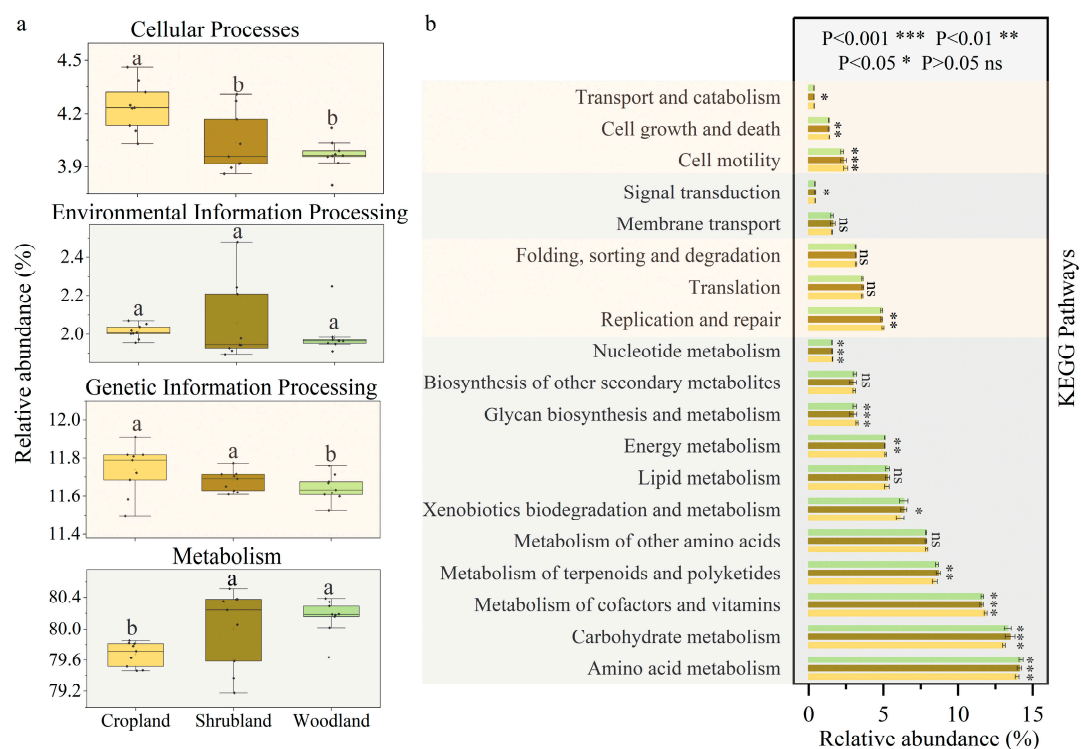

**Figure S2.** (a) 4 key bacterial ecologically relevant functions and (b) their sub-functions based on PICRUSt2 prediction ( $n = 9$ ). "ns", "\*", "\*\*", and "\*\*\*" represent  $p > 0.05$ ,  $p < 0.05$ ,  $p < 0.01$ , and  $p < 0.001$ , respectively. Different letters indicated significant difference between different land use types ( $p < 0.05$ ).

**Table S1.** Contextual characteristics of the study sites.

|       | Land use Types | Coordinates          | Aridity index | Species                                            | Understory vegetation richness | Average tree height (m) | Canopy density (%) |
|-------|----------------|----------------------|---------------|----------------------------------------------------|--------------------------------|-------------------------|--------------------|
| Site1 | Cropland       | 39.55°N;<br>108.50°E | 0.176         | <i>Zea mays</i> L.                                 | -                              | -                       | -                  |
|       | Shrubland      | 39.55°N;<br>108.50°E |               | <i>Artemisia ordosica</i> Krasch                   | 13.3                           | -                       | 45                 |
|       | Woodland       | 39.55°N;<br>108.50°E |               | <i>Pinus sylvestris</i>                            | 7.8                            | 6.55                    | 80                 |
| Site2 | Cropland       | 38.18°N;<br>107.82°E | 0.226         | <i>Zea mays</i> L.                                 | -                              | -                       | -                  |
|       | Shrubland      | 38.18°N;<br>107.82°E |               | <i>Caragana intermedia</i>                         | 3                              | -                       | 20                 |
|       | Woodland       | 38.18°N;<br>107.51°E |               | <i>Pinus sylvestris</i>                            | 3.33                           | 9.89                    | 85                 |
| Site3 | Cropland       | 38.23°N;<br>108.21°E | 0.239         | <i>Zea mays</i> L.                                 | -                              | -                       | -                  |
|       | Shrubland      | 38.23°N;<br>108.21°E |               | <i>Caragana intermedia</i>                         | 4.67                           | -                       | 65                 |
|       | Woodland       | 38.23°N;<br>108.21°E |               | <i>Populus simonii</i> /<br><i>Ulmus pumila</i> L. | 14                             | 23.2                    | 85                 |

Note: The aridity index is calculated as the mean annual precipitation divided by the potential evaporation. The higher the aridity index value the higher the humidity.
